# Supplementary material
Source: PubMed Central journal article supplement (PMC4553037)
Supplement: NIHMS707771-supplement-01.pdf [file NIHMS707771-supplement-01.pdf]

# THE LANCET

## **Supplementary appendix**

This appendix formed part of the original submission and has been peer reviewed. We post it as supplied by the authors.

Supplement to: Schnabel RB, Yin X, Gona P, et al. 50 year trends in atrial fibrillation prevalence, incidence, risk factors, and mortality in the Framingham Heart Study: a cohort study. *Lancet* 2015; published online May 8. [http://dx.doi.org/10.1016/S0140-6736\(14\)61774-8](http://dx.doi.org/10.1016/S0140-6736(14)61774-8).

# Supplementary Material

## **50 year trends in atrial fibrillation prevalence, incidence, risk factors, and mortality in the Framingham Heart Study: a cohort study**

Renate B. Schnabel, MD; Xiaoyan Yin, PhD; Philimon Gona, PhD; Martin G. Larson, ScD; Alexa S. Beiser, PhD; David D. McManus, MD; Christopher Newton-Cheh, MD; Steven A. Lubitz, MD; Jared W. Magnani, MD; Patrick T. Ellinor, MD; Sudha Seshadri, MD; Philip A. Wolf, MD; Ramachandran S. Vasan, MD; Emelia J. Benjamin, MD\*; Daniel Levy, MD\*

\*These authors contributed equally.

# Supplement: 50 Year Risk of Atrial Fibrillation

## Table of Contents for the Supplement

|                                 |                                                                                                                                   |         |
|---------------------------------|-----------------------------------------------------------------------------------------------------------------------------------|---------|
| <b>Supplementary Methods 1.</b> | Risk factor assessment in the Framingham Heart Study                                                                              | Page 2  |
| <b>Supplementary Methods 2.</b> | Population attributable risk calculation                                                                                          | Page 3  |
| <b>Supplementary Figure 1.</b>  | Total atrial fibrillation incidence and prevalence rates                                                                          | Page 7  |
| <b>Supplementary Table 1.</b>   | Sources of first detected atrial fibrillation                                                                                     | Page 9  |
| <b>Supplementary Table 2.</b>   | Characteristics for participants with incident atrial fibrillation by sex                                                         | Page 10 |
| <b>Supplementary Table 3.</b>   | 3-1 Constant hazards ratios                                                                                                       | Page 14 |
|                                 | 3-2 Varying hazards ratios used in population attributable risk calculation                                                       | Page 15 |
| <b>Supplementary Table 4.</b>   | Adjusted hazards ratios for mortality in 20 years after atrial fibrillation                                                       | Page 16 |
| <b>Supplementary Table 5.</b>   | Age-adjusted survival rates after atrial fibrillation onset for 5-year intervals                                                  | Page 18 |
| <b>Supplementary Table 6.</b>   | Adjusted hazards ratios for incident stroke after atrial fibrillation onset according to time period of atrial fibrillation onset | Page 19 |

# Supplement: 50 Year Risk of Atrial Fibrillation

## Supplementary Methods 1

### *Risk factor assessment*

The diagnosis of diabetes was based on a fasting blood glucose  $\geq 126$  mg/dL, non-fasting blood glucose  $\geq 200$  mg/dL, or current use of insulin or oral hypoglycemic medications. The mean of two Framingham physician blood pressure measurements was used to define systolic and diastolic blood pressure (except for Offspring cohort examination 1 at which only a single physician reading was available for most participants). Medication use, smoking habits, and alcohol consumption were self-reported. Participants who regularly smoked at least 1 cigarette per day within the last year prior to the index examination were classified as current smokers. Alcohol consumption was classified as none, mild (1-14 drinks/week in men and 1-7 drinks/week in women), and moderate or heavy consumption ( $>14$  drinks/week in men and  $>7$  drinks/week in women). Electrocardiographic voltage criteria in conjunction with repolarization changes were used for diagnosis of left ventricular hypertrophy.<sup>1</sup> Heart failure was diagnosed based on major clinical criteria that have been used for all heart failure cases of Framingham participants.<sup>2</sup> Major criteria included paroxysmal nocturnal dyspnea or orthopnoea, rales on auscultation, third heart sound, pulmonary edema, distended neck veins, increased venous pressure, hepatjugular reflux, significant weight loss on diuretic therapy, and radiographic cardiomegaly.

A heart murmur was considered clinically significant if a systolic murmur of at least three out of six intensity, or any diastolic murmur was detected on physician auscultation at the Framingham Heart Study clinic examination. All characteristics including heart failure, myocardial infarction and stroke prevalence were assessed from index exam, which was identified for each individual for each time period. The index examination was defined as the last examination prior to AF but no more than 10 years earlier. For the analysis of atrial fibrillation on Framingham examination: If participants had a diagnosis of atrial fibrillation in the interim (between Framingham exams), but returned for follow-up at the Framingham clinic the case was counted as incident disease if atrial fibrillation was present on the clinic electrocardiogram. If a participant was missing information on valvular heart disease,

## **Supplement: 50 Year Risk of Atrial Fibrillation**

electrocardiographic left ventricular hypertrophy, or diabetes at an examination, the risk factor information was carried over from prior examination cycles within the last four years.

The date of last follow-up was December 31, 2011.

Decades 1958-1967, 1968-1977, 1978-1987, 1988-1997, 1998-2007 were coded as 1, 2, 3, 4 and 5. For post-AF incident stroke and survival analysis, events were censored at 20 years or end of 2011 (or death in stroke analyses), whichever came first. For all other analyses, the events were censored at the end of each decade, loss to follow up or death, whichever came first.

# Supplement: 50 Year Risk of Atrial Fibrillation

## Supplementary Methods 2

### *Population Attributable Risk Calculation*

- A. Continuous risk factors were categorized into 3 (drinking and body mass index) or 5 (systolic blood pressure) levels as in Table 2. For each level of these risk factors or each dichotomous risk factor, a trend test was conducted to assess whether prevalence increased or decreased over time period. We used logistic regression models with decade as predictor adjusting for age and sex. If trend is significant ( $p < 0.05$ ), the average predicted prevalence from the model with age, sex and decade as predictors is reported is used in PAR; if trend is not significant, the average predicted prevalence from the model with age and sex only is used in PAR. These values are all reported in Table 2.
- B. To assess linear trend across decades for hazard ratios for each trait we performed Cox's proportional hazards models with time to AF as outcome, age, sex, decade, risk factor and interaction(s) between risk factor and decade as predictors. The hazard ratio estimates from these models are displayed in Table 3. If the interaction term is significant ( $p < 0.05$ ), i.e. linear trend across decade is significant, hazard ratios estimated from models with interaction terms (App. Table 2-2) are used in PAR; otherwise hazard ratios estimated from model without interaction terms, i.e. adjusting for age, sex and decade only (App. Table 2-1) are used in PAR.
- C. We used adjusted hazard ratios to calculate population attributable risk [PAR] Equation 4,<sup>3</sup> i.e.,  $PAR = 100 * (pd * [(HR - 1)]/HR$ , where  $pd$  is the prevalence of the particular trait estimated in A and  $HR$  is the hazard ratio estimated in B. For multi-level risk factors PAR was calculated using Equation 5,<sup>3</sup> i.e.  $PAR = 100 * (pd(i) * [1 - (\sum pd(i) \div HR(i))]$  where  $pd(i)$  is the prevalence for each level of the multinomial trait and  $HR(i)$  is the corresponding hazard associated with

## Supplement: 50 Year Risk of Atrial Fibrillation

the level of the multinomial trait estimated in B. As a consequence, for a risk factor if there is no trend in prevalence, nor is there linear trend in hazard ratio, the PAR is constant. Risk factors that are not associated with incident AF (p value for constant HR >0.05) are deemed not contributing.

### Reference List

- 1 Kannel WB, Gordon T, Offutt D. Left ventricular hypertrophy by electrocardiogram. Prevalence, incidence, and mortality in the Framingham study. *Ann Intern Med* 1969;**71**:89-105.
- 2 Ho KK, Anderson KM, Kannel WB, Grossman W, Levy D. Survival after the onset of congestive heart failure in Framingham Heart Study subjects. *Circulation* 1993;**88**:107-15.
- 3 Rockhill B, Newman B, Weinberg C. Use and misuse of population attributable fractions. *Am J Public Health* 1998;**88**:15-9.

## Supplement: 50 Year Risk of Atrial Fibrillation

**Supplementary Figure 1.** Trends in total atrial fibrillation incidence rates and prevalence rates per 1000 person-years lived during each period with 95% confidence intervals shown by color bands.

### Men

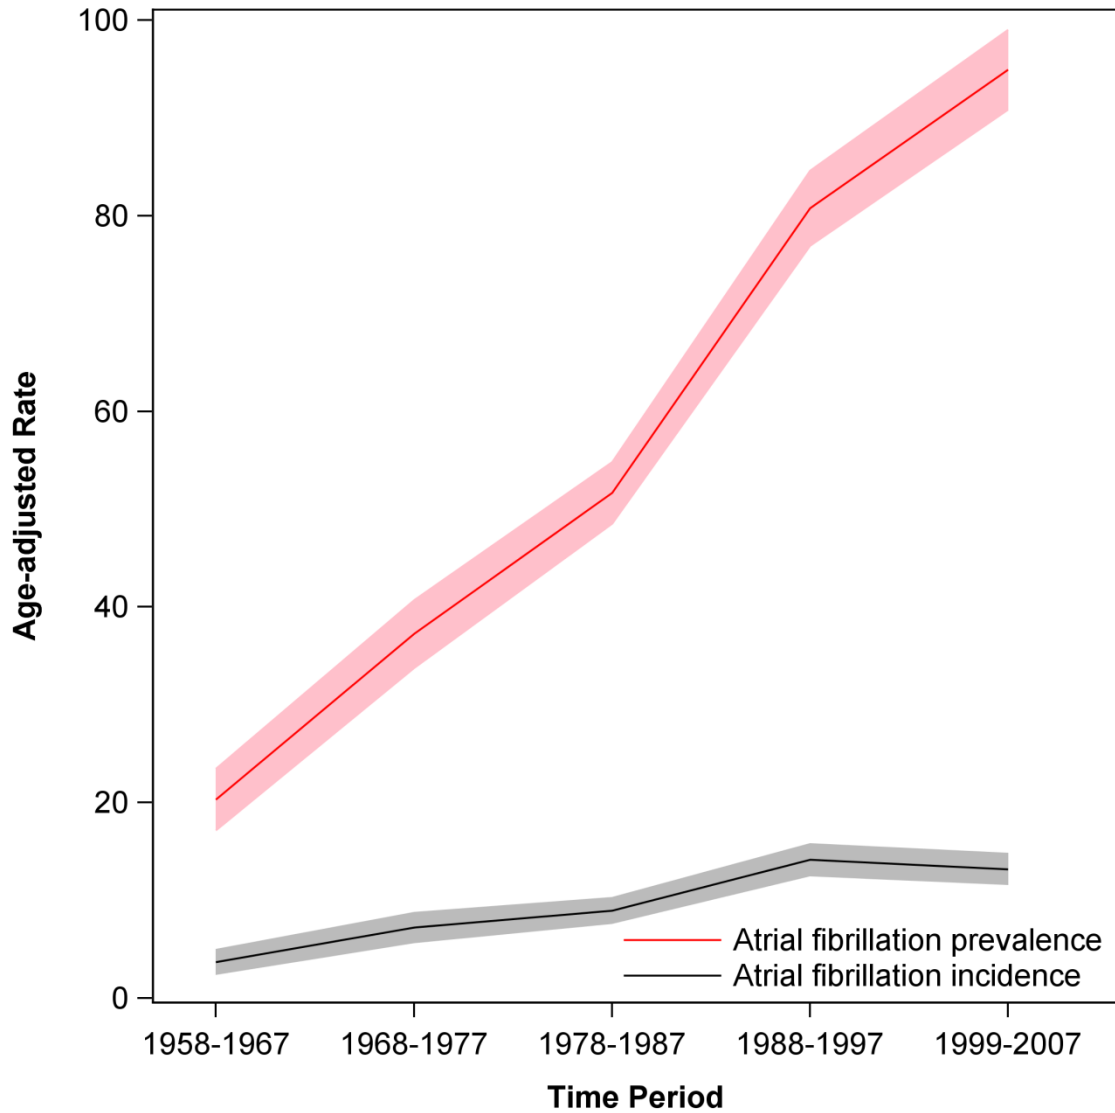



## Supplement: 50 Year Risk of Atrial Fibrillation

Women

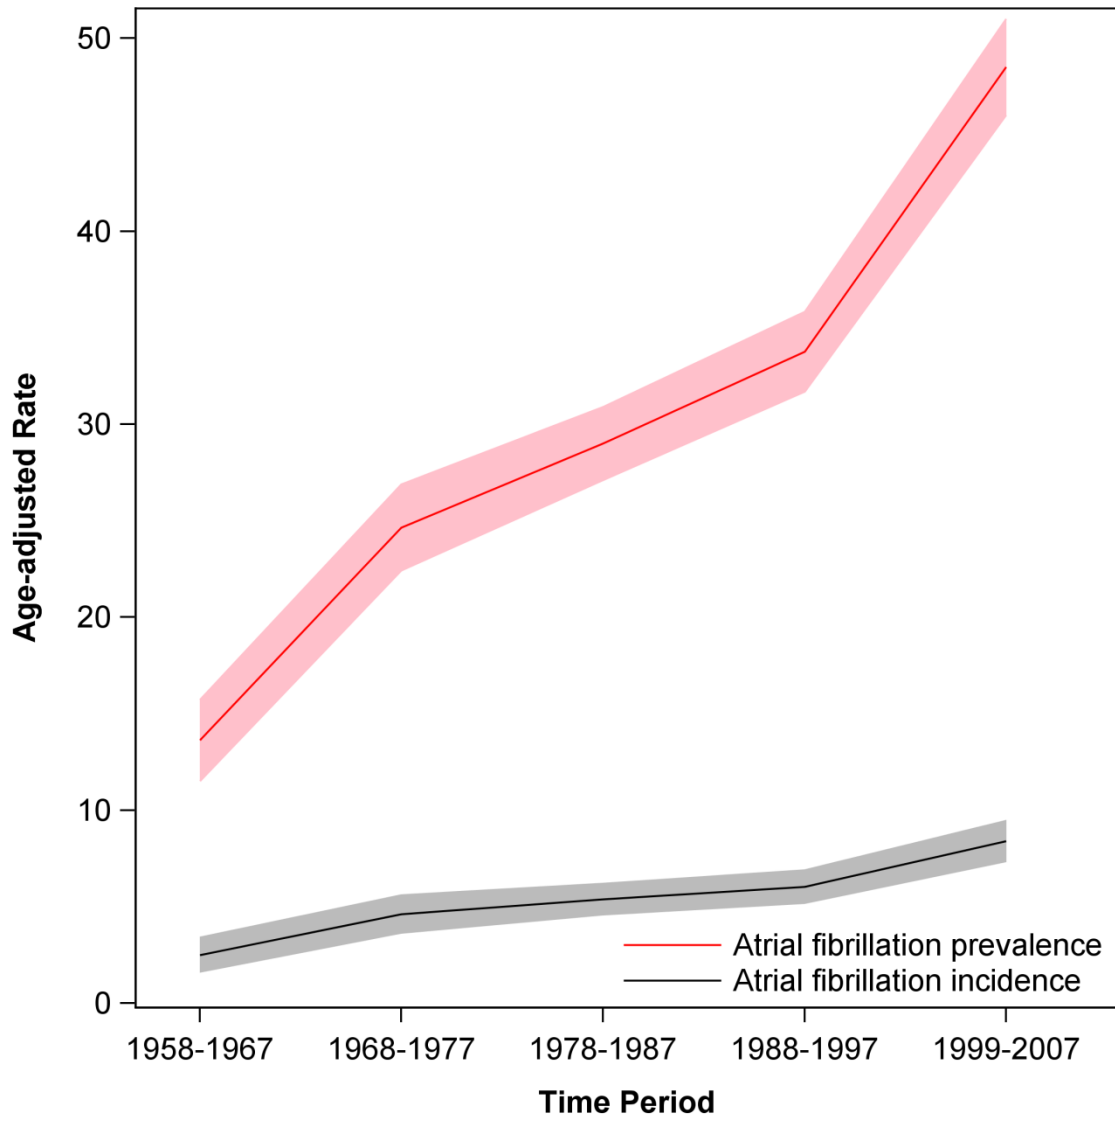

## Supplement: 50 Year Risk of Atrial Fibrillation

**Supplementary Table 1.** Sources of First Detected Atrial Fibrillation

| Source of ECG                            |          | Decade    |           |           |           |           | Total N |
|------------------------------------------|----------|-----------|-----------|-----------|-----------|-----------|---------|
|                                          |          | 1958-1967 | 1968-1977 | 1978-1987 | 1988-1997 | 1998-2007 |         |
| Hospital or emergency room               | <b>N</b> | 35        | 106       | 242       | 326       | 342       | 1051    |
|                                          | <b>%</b> | 46.7      | 55.5      | 74.0      | 70.9      | 69.7      |         |
| Outside physician                        | <b>N</b> | 0         | 2         | 4         | 48        | 90        | 144     |
|                                          | <b>%</b> | 0.0       | 1.1       | 1.2       | 10.4      | 18.3      |         |
| Framingham Heart Study exam              | <b>N</b> | 28        | 56        | 59        | 38        | 21        | 202     |
|                                          | <b>%</b> | 37.3      | 29.3      | 18.0      | 8.3       | 4.3       |         |
| Outside Holter electrocardiogram         | <b>N</b> | 0         | 0         | 1         | 6         | 12        | 19      |
|                                          | <b>%</b> | 0.0       | 0.0       | 0.3       | 1.3       | 2.4       |         |
| Framingham Heart Study electrocardiogram | <b>N</b> | 0         | 0         | 6         | 1         | 0         | 7       |
|                                          | <b>%</b> | 0.0       | 0.0       | 1.8       | 0.2       | 0.0       |         |
| By history, electrocardiographic report* | <b>N</b> | 12        | 27        | 15        | 41        | 24        | 119     |
|                                          | <b>%</b> | 16.0      | 14.1      | 4.6       | 8.9       | 4.9       |         |
| Implantable cardiac device interrogation | <b>N</b> | 0         | 0         | 0         | 0         | 2         | 2       |
|                                          | <b>%</b> | 0.0       | 0.0       | 0.0       | 0.0       | 0.4       |         |
| <b>Total</b>                             | <b>N</b> | 75        | 191       | 327       | 460       | 491       | 1544    |

Provided are number and column %.

\*Close to 100% of individuals with first diagnosis of atrial fibrillation based on history or electrocardiographic report only had a subsequent electrocardiographic tracing with atrial fibrillation.

## Supplement: 50 Year Risk of Atrial Fibrillation

**Supplementary Table 2.** Clinical Characteristics for Participants with Incident Atrial Fibrillation by Sex\*

| Men                                            | Decade          |                 |                  |                  |                  | P for Trend† | Trend            |
|------------------------------------------------|-----------------|-----------------|------------------|------------------|------------------|--------------|------------------|
|                                                | 1958-1967       | 1968-1977       | 1978-1987        | 1988-1997        | 1998-2007        |              |                  |
| <b>Total no. atrial fibrillation in period</b> | <b>40</b>       | <b>101</b>      | <b>166</b>       | <b>266</b>       | <b>248</b>       |              | <b>Direction</b> |
| <b>No. atrial fibrillation with index exam</b> | <b>38 (95%)</b> | <b>99 (98%)</b> | <b>146 (88%)</b> | <b>235 (88%)</b> | <b>223 (90%)</b> |              |                  |
| <i>Age, years</i>                              | 62.6±6.5        | 68.1±7.6        | 69.7±9.2         | 71.0±9.5         | 71.5±9.6         | <0.0001      | ↑                |
| 50-59                                          | 10(26.3)        | 12(12.1)        | 20(13.7)         | 36(15.3)         | 31(13.9)         |              |                  |
| 60-69                                          | 22(57.9)        | 42(42.4)        | 58(39.7)         | 51(21.7)         | 62(27.8)         |              |                  |
| 70-79                                          | 6(15.8)         | 40(40.4)        | 43(29.5)         | 100(42.6)        | 75(33.6)         |              |                  |
| 80-89                                          | 0 (0.0)         | 5(5.1)          | 25(17.1)         | 48(20.4)         | 55(24.7)         |              |                  |
| Current smoking — no. (%)                      | 17(48.6)        | 20(24.1)        | 36(25.4)         | 39(16.7)         | 25(11.2)         | <0.0001      | ↓                |
| <i>Alcohol consumption</i>                     |                 |                 |                  |                  |                  |              |                  |
| None — no. (%)                                 | 9(29.0)         | 27(28.7)        | 49(34.3)         | 82(35.2)         | 77(35.0)         | 0.77         | —                |
| Mild — no. (%)                                 | 19(61.3)        | 51(54.3)        | 76(53.1)         | 140(60.1)        | 135(61.4)        | 0.06         | ?                |
| Moderate or heavy — no. (%)                    | 3(9.7)          | 16(17)          | 18(12.6)         | 11(4.7)          | 8(3.6)           | <0.0001      | ↓                |
| <i>Body mass index, kg/m<sup>2</sup></i>       | 26.7±3.4        | 27.0±4.0        | 26.8±3.7         | 27.6±3.9         | 29.3±4.8         | <0.0001      | ↑                |
| Normal, <25                                    | 9(25)           | 28(31.8)        | 47(32.9)         | 60(26)           | 44(21.6)         | 0.001        | ↓                |
| Overweight, 25 to <30                          | 19(52.8)        | 46(52.3)        | 62(43.4)         | 121(52.4)        | 81(39.7)         | 0.20         | -                |
| Obese, ≥30                                     | 8(22.2)         | 14(15.9)        | 34(23.8)         | 50(21.6)         | 79(38.7)         | <0.0001      | ↑                |

## Supplement: 50 Year Risk of Atrial Fibrillation

| Men                                                         | Decade          |                 |                  |                  |                  | P for Trend† | Trend            |
|-------------------------------------------------------------|-----------------|-----------------|------------------|------------------|------------------|--------------|------------------|
|                                                             | 1958-1967       | 1968-1977       | 1978-1987        | 1988-1997        | 1998-2007        |              |                  |
| <b>Total no. atrial fibrillation in period</b>              | <b>40</b>       | <b>101</b>      | <b>166</b>       | <b>266</b>       | <b>248</b>       |              | <b>Direction</b> |
| <b>No. atrial fibrillation with index exam</b>              | <b>38 (95%)</b> | <b>99 (98%)</b> | <b>146 (88%)</b> | <b>235 (88%)</b> | <b>223 (90%)</b> |              |                  |
| <i>Systolic blood pressure, mm Hg</i>                       | 154±29          | 146±23          | 142±22           | 141±22           | 135±19           | <0•0001      | ↓                |
| Optimal, <120                                               | 3(7•9)          | 14(14•1)        | 21(14•4)         | 38(16•2)         | 49(22)           | 0•001        | ↑                |
| Normal, 120-129                                             | 7(18•4)         | 10(10•1)        | 16(11)           | 37(15•7)         | 40(17•9)         | 0•09         | ?                |
| High-normal 130-139                                         | 2(5•3)          | 12(12•1)        | 29(19•9)         | 43(18•3)         | 52(23•3)         | 0•004        | ↑                |
| Stage I Hypertension, 140-159                               | 12(31•6)        | 38(38•4)        | 54(37)           | 79(33•6)         | 58(26)           | 0•008        | ↓                |
| Stage II-IV Hypertension ≥160                               | 14(36•8)        | 25(25•3)        | 26(17•8)         | 38(16•2)         | 24(10•8)         | <0•0001      | ↓                |
| Hypertension treatment — no. (%)                            | 5(13•9)         | 29(30•5)        | 58(39•7)         | 122(52•4)        | 126(56•8)        | <0•0001      | ↑                |
| Diabetes — no. (%)                                          | 1(2•6)          | 16(16•2)        | 21(14•6)         | 48(20•6)         | 51(23•7)         | 0•002        | ↑                |
| Electrocardiographic left ventricular hypertrophy — no. (%) | 6(15•8)         | 13(13•1)        | 5(3•4)           | 15(6•9)          | 7(3•3)           | <0•0001      | ↓                |
| Significant heart murmur — no. (%)                          | 6(15•8)         | 15(15•8)        | 17(12•1)         | 20(8•5)          | 21(10•1)         | 0•045        | ↓                |
| Prevalent heart failure — no. (%)                           | 2(5•3)          | 10(10•1)        | 6(4•1)           | 11(4•7)          | 9(4)             | 0•054        | ?                |
| Prevalent myocardial infarction — no. (%)                   | 5(13•2)         | 14(14•1)        | 20(13•7)         | 37(15•7)         | 35(15•7)         | 0•45         | -                |
| Prevalent stroke — no. (%)                                  | 1(2•6)          | 5(5•1)          | 6(4•1)           | 13(5•5)          | 15(6•7)          | 0•64         | -                |

## Supplement: 50 Year Risk of Atrial Fibrillation

| Women                                          | Decade          |                 |                  |                  |                  | P for Trend† | Trend Direction |
|------------------------------------------------|-----------------|-----------------|------------------|------------------|------------------|--------------|-----------------|
|                                                | 1958-1967       | 1968-1977       | 1978-1987        | 1988-1997        | 1998-2007        |              |                 |
| <b>Total no. atrial fibrillation in period</b> | <b>35</b>       | <b>91</b>       | <b>160</b>       | <b>192</b>       | <b>243</b>       |              |                 |
| <b>No. atrial fibrillation with index exam</b> | <b>32 (91%)</b> | <b>79 (87%)</b> | <b>138 (86%)</b> | <b>164 (85%)</b> | <b>211 (87%)</b> |              |                 |
| <i>Age, years</i>                              | 64.5±6.1        | 71.1±7.7        | 73.8±9.3         | 74.7±8.0         | 74.3±9.0         | <0.0001      | ↑               |
| 50-59                                          | 6(18.8)         | 5(6.3)          | 10(7.2)          | 8(4.9)           | 18(8.5)          |              |                 |
| 60-69                                          | 20(62.5)        | 27(34.2)        | 31(22.5)         | 29(17.7)         | 37(17.5)         |              |                 |
| 70-79                                          | 6(18.8)         | 33(41.8)        | 52(37.7)         | 70(42.7)         | 87(41.2)         |              |                 |
| 80-89                                          | 0 (0.0)         | 14(17.7)        | 45(32.6)         | 57(34.8)         | 69(32.7)         |              |                 |
| Current smoking — number (%)                   | 10(32.3)        | 15(20.3)        | 24(17.8)         | 23(14.1)         | 30(14.2)         | 0.24         | -               |
| <i>Alcohol consumption</i>                     |                 |                 |                  |                  |                  |              |                 |
| None — no. (%)                                 | 16(57.1)        | 26(35.6)        | 78(60.5)         | 86(53.8)         | 109(53.7)        | 0.69         | -               |
| Mild — no. (%)                                 | 9(32.1)         | 41(56.2)        | 46(35.7)         | 60(37.5)         | 79(38.9)         | 0.64         | -               |
| Moderate or heavy — number (%)                 | 3(10.7)         | 6(8.2)          | 5(3.9)           | 14(8.8)          | 15(7.4)          | 0.92         | -               |
| <i>Body mass index, kg/m<sup>2</sup></i>       | 27.9±6.2        | 27.1±5.5        | 26.3±5.5         | 27.4±6.1         | 27.9±6.2         | 0.03         | ↑               |
| Normal, <25                                    | 11(36.7)        | 28(40.6)        | 60(48.0)         | 55(37.4)         | 61(34.9)         | 0.12         | -               |
| Overweight, 25 to <30                          | 9(30.0)         | 22(31.9)        | 39(31.2)         | 52(35.4)         | 59(33.7)         | 0.84         | -               |
| Obese, ≥30                                     | 10(33.3)        | 19(27.5)        | 26(20.8)         | 40(27.2)         | 55(31.4)         | 0.15         | -               |
| <i>Systolic blood pressure, mm Hg</i>          | 156±27          | 159±27          | 147±22           | 147±22           | 141±25           | <0.0001      | ↓               |
| Optimal, <120                                  | 2(6.3)          | 5(6.3)          | 15(10.9)         | 15(9.1)          | 39(18.6)         | <0.0001      | ↑               |
| Normal, 120-129                                | 2(6.3)          | 3(3.8)          | 16(11.7)         | 20(12.2)         | 33(15.7)         | 0.003        | ↑               |
| High-normal 130-139                            | 6(18.8)         | 11(13.9)        | 22(16.1)         | 32(19.5)         | 39(18.6)         | 0.50         | -               |

## Supplement: 50 Year Risk of Atrial Fibrillation

| Women                                          | Decade          |                 |                  |                  |                  | P for Trend† | Trend Direction |
|------------------------------------------------|-----------------|-----------------|------------------|------------------|------------------|--------------|-----------------|
|                                                | 1958-1967       | 1968-1977       | 1978-1987        | 1988-1997        | 1998-2007        |              |                 |
| <b>Total no. atrial fibrillation in period</b> | <b>35</b>       | <b>91</b>       | <b>160</b>       | <b>192</b>       | <b>243</b>       |              |                 |
| <b>No. atrial fibrillation with index exam</b> | <b>32 (91%)</b> | <b>79 (87%)</b> | <b>138 (86%)</b> | <b>164 (85%)</b> | <b>211 (87%)</b> |              |                 |
| Stage I Hypertension, 140-159                  | 9(28•1)         | 26(32•9)        | 45(32•8)         | 55(33•5)         | 50(23•8)         | 0•07         | ?               |
| Stage II-IV Hypertension ≥160                  | 13(40•6)        | 34(43•0)        | 39(28•5)         | 42(25•6)         | 49(23•3)         | <0•0001      | ↓               |
| Hypertension treatment — no. (%)               | 10(31•3)        | 26(36•1)        | 77(56•2)         | 97(59•9)         | 131(63•0)        | <0•0001      | ↑               |
| Diabetes — no. (%)                             | 3(9•4)          | 9(11•4)         | 23(16•8)         | 18(11•0)         | 29(15•0)         | 0•51         | -               |
| ECG left ventricular hypertrophy — no. (%)     | 3(9•4)          | 8(10•1)         | 14(10•6)         | 8(5•2)           | 5(2•4)           | <0•0001      | ↓               |
| Significant heart murmur — no. (%)             | 8(25•0)         | 17(23•0)        | 35(26•7)         | 22(14•0)         | 10(5•7)          | <0•0001      | ↓               |
| Prevalent heart failure — no. (%)              | 2(6•3)          | 5(6•3)          | 11(8•0)          | 12(7•3)          | 6(2•8)           | 0•08         | ?               |
| Prevalent myocardial infarction — no. (%)      | 1(3•1)          | 2(2•5)          | 7(5•1)           | 8(4•9)           | 12(5•7)          | 0•36         | -               |
| Prevalent stroke —no. (%)                      | 0(0•0)          | 6(7•6)          | 11(8•0)          | 7(4•3)           | 13(6•2)          | 0•54         | -               |

All characteristics including heart failure, myocardial infarction and stroke prevalence were assessed from index exam, which was identified for each individual for each time period. The index examination was defined as the last examination prior to AF but no more than 10 years earlier.

\*Data are mean ± standard deviation or N (%).

†P values are obtained from linear or logistic models adjusting for age.

## Supplement: 50 Year Risk of Atrial Fibrillation

**Supplementary Table 3-1** Constant Hazards Ratios Used in Population Attributable Risk Calculation

| <b>Variable</b>                                   | <b>Constant Hazards Ratio</b> | <b>P for Constant Hazards Ratio</b> |
|---------------------------------------------------|-------------------------------|-------------------------------------|
| <i>Age, years</i>                                 |                               |                                     |
| 50-59 (referent)                                  | 1•00                          |                                     |
| 60-69                                             | 4•2                           | <0•0001                             |
| 70-79                                             | 6•6                           | <0•0001                             |
| 80-89                                             | 9•0                           | <0•0001                             |
| Current smoking                                   | 0•94                          | 0•38                                |
| <i>Alcohol consumption, %</i>                     |                               |                                     |
| None (referent)                                   | 1•00                          |                                     |
| Mild                                              | 1•04                          | 0•54                                |
| Moderate or heavy                                 | 1•17                          | 0•18                                |
| <i>Body mass index, kg/m<sup>2</sup></i>          |                               |                                     |
| Normal, <25 (referent)                            | 1•00                          |                                     |
| Overweight, 25 to <30                             | 1•17                          | 0•02                                |
| Obese, ≥30                                        | 1•52                          | <0•0001                             |
| <i>Systolic blood pressure, mm Hg</i>             |                               |                                     |
| Optimal, <120 (referent)                          | 1•00                          |                                     |
| Normal, 120-129                                   | 0•92                          | 0•41                                |
| High-normal 130-139                               | 1•13                          | 0•20                                |
| Hypertension treatment                            | 1•47                          | <0•0001                             |
| Diabetes                                          | 1•44                          | <0•0001                             |
| Electrocardiographic left ventricular hypertrophy | 2•39                          | <0•0001                             |
| Myocardial infarction                             | 1•58                          | <0•0001                             |

## Supplement: 50 Year Risk of Atrial Fibrillation

**Supplementary Table 3-2** Varying Hazards Ratios Used in Population Attributable Risk Calculation

|                                       | Decade    |           |           |           |           |
|---------------------------------------|-----------|-----------|-----------|-----------|-----------|
|                                       | 1958-1967 | 1968-1977 | 1978-1987 | 1988-1997 | 1998-2007 |
| <i>Systolic blood pressure, mm Hg</i> |           |           |           |           |           |
| Stage I Hypertension, 140-159         | 2•23      | 1•79      | 1•42      | 1•14      | 0•91      |
| Stage II-IV Hypertension $\geq$ 160   | 2•39      | 1•91      | 1•53      | 1•22      | 0•98      |
| Significant heart murmur              | 5•06      | 3•77      | 2•81      | 2•09      | 1•56      |
| Heart failure                         | 4•32      | 3•35      | 2•60      | 2•02      | 1•56      |

Derivation of hazards ratios used in **Table 4** of the main manuscript. For risk factors without trend in prevalence, the average predicted prevalence from logistic models with age and sex as predictors (**Table 2** main manuscript) were used in population attributable risk calculation; for factors with trend in prevalence, the average predicted prevalence from logistics models with age, sex and period as predictors were used in population attributable risk.

For risk factors without trend in hazards ratio, the constant hazards ratio estimated from Cox models with age, sex, period and risk factors as predictors (**Supplementary Table 3-1**) were used in population attributable risk calculation; for factors with trend in hazards ratio, the hazards ratios from Cox models with age, sex, period, risk factors, and period and risk factor interaction as predictors (**Supplementary Table 3-2**) were used in population attributable risk.



## Supplement: 50 Year Risk of Atrial Fibrillation

**Supplementary Table 4.** Adjusted Hazards Ratios for Mortality in 20 Years after Atrial Fibrillation Onset According to Time Period of Atrial

Fibrillation Onset

|                                      | Decade of Atrial Fibrillation Onset<br>Adjusted Hazards Ratios (95% Confidence Interval) |                  |                  |                  | 1998-2007<br>Referent | Trend     |         |
|--------------------------------------|------------------------------------------------------------------------------------------|------------------|------------------|------------------|-----------------------|-----------|---------|
|                                      | 1958-1967                                                                                | 1968-1977        | 1978-1987        | 1988-1997        |                       | Direction | P value |
| <b>Number of atrial fibrillation</b> | 70                                                                                       | 178              | 284              | 399              | 434                   |           |         |
| <b>Number of deaths</b>              | 61 (87%)                                                                                 | 162 (91%)        | 263 (93%)        | 355 (89%)        | 263 (61%)             |           |         |
| <b>Total (n=1365)</b>                |                                                                                          |                  |                  |                  |                       |           |         |
| <b>Age-sex-adjusted</b>              | 1.53 (1.14-2.05)                                                                         | 1.38 (1.12-1.69) | 1.49 (1.25-1.77) | 1.14 (0.97-1.35) | 1.00                  | ↓         | <0.0001 |
| <b>Multivariable-adjusted</b>        | 1.34 (0.97-1.86)                                                                         | 1.34 (1.06-1.69) | 1.36 (1.12-1.66) | 1.13 (0.95-1.35) | 1.00                  | ↓         | 0.003   |
| <b>Men (N=741)</b>                   |                                                                                          |                  |                  |                  |                       |           |         |
| <b>Age-adjusted</b>                  | 1.80 (1.21-2.67)                                                                         | 1.15 (0.87-1.52) | 1.35 (1.06-1.73) | 1.00 (0.81-1.25) | 1.00                  | ↓         | 0.005   |
| <b>Multivariable-adjusted</b>        | 1.67 (1.06-2.63)                                                                         | 1.15 (0.83-1.58) | 1.29 (0.98-1.70) | 0.99 (0.78-1.25) | 1.00                  | ↓         | 0.03    |
| <b>Women (N=624)</b>                 |                                                                                          |                  |                  |                  |                       |           |         |
| <b>Age-adjusted</b>                  | 1.27 (0.81-1.98)                                                                         | 1.72 (1.28-2.31) | 1.62 (1.26-2.08) | 1.33 (1.05-1.70) | 1.00                  | ↓         | 0.0007  |
| <b>Multivariable-adjusted</b>        | 1.10 (0.69-1.76)                                                                         | 1.58 (1.13-2.2)  | 1.42 (1.06-1.88) | 1.34 (1.02-1.75) | 1.00                  | ↓         | 0.057   |

## **Supplement: 50 Year Risk of Atrial Fibrillation**

Multivariable models were adjusted for age, current smoking, systolic blood pressure, hypertension treatment, electrocardiographic left ventricular hypertrophy, diabetes, heart failure, significant heart murmur, and myocardial infarction. For trend test, time periods were coded 1(1958-1967), 2(1968-1977), 3(1978-1987), 4(1988-1997) and 5(1998-2007).

## Supplement: 50 Year Risk of Atrial Fibrillation

**Supplementary Table 5.** Age-adjusted Survival Rates After Atrial Fibrillation Onset for 5-Year Intervals by Sex and Decade

| Time<br>(years) |    | 1958-1967       | 1968-1977       | 1978-1987       | 1988-1997       | 1998-2007       |
|-----------------|----|-----------------|-----------------|-----------------|-----------------|-----------------|
| <b>Men</b>      | 5  | 0•47(0•39-0•55) | 0•51(0•46-0•56) | 0•50(0•45-0•55) | 0•58(0•54-0•62) | 0•63(0•59-0•67) |
|                 | 10 | 0•25(0•18-0•32) | 0•29(0•24-0•34) | 0•28(0•24-0•32) | 0•35(0•31-0•39) | 0•41(0•36-0•46) |
|                 | 15 | 0•14(0•09-0•19) | 0•17(0•13-0•21) | 0•16(0•13-0•19) | 0•22(0•19-0•25) |                 |
| <b>Women</b>    | 5  | 0•45(0•36-0•54) | 0•49(0•43-0•55) | 0•48(0•43-0•53) | 0•56(0•52-0•60) | 0•61(0•57-0•65) |
|                 | 10 | 0•22(0•15-0•29) | 0•25(0•20-0•30) | 0•25(0•21-0•29) | 0•32(0•28-0•36) | 0•38(0•33-0•43) |
|                 | 15 | 0•11(0•07-0•15) | 0•13(0•09-0•17) | 0•12(0•09-0•15) | 0•17(0•14-0•20) |                 |

Provided are survival rates for new onset atrial fibrillation after 5, 10 and 15 years by decade of atrial fibrillation onset.

## Supplement: 50 Year Risk of Atrial Fibrillation

**Supplementary Table 6.** Adjusted Hazards Ratios for Incident Stroke in 20 Years after Atrial Fibrillation Onset According to Time Period of Atrial Fibrillation Onset

|                                      | Decade of Atrial Fibrillation Onset<br>Adjusted Hazards Ratios (95% Confidence Interval) |                 |                 |                 | 1998-2007<br>Referent | Trend     |         |
|--------------------------------------|------------------------------------------------------------------------------------------|-----------------|-----------------|-----------------|-----------------------|-----------|---------|
|                                      | 1958-1967                                                                                | 1968-1977       | 1978-1987       | 1988-1997       |                       | Direction | P value |
| <b>Number of atrial fibrillation</b> | 64                                                                                       | 157             | 249             | 363             | 384                   |           |         |
| <b>Number of strokes</b>             | 20 (31%)                                                                                 | 33 (21%)        | 46 (18%)        | 66 (18%)        | 36 (9%)               |           |         |
| <b>Total (n=1217)</b>                |                                                                                          |                 |                 |                 |                       |           |         |
| <b>Age- and sex-adjusted</b>         | 3.19(1.79-5.69)                                                                          | 2.07(1.27-3.36) | 1.94(1.25-3.03) | 1.59(1.06-2.41) | 1.00                  | ↓         | <0.0001 |
| <b>Multivariable-adjusted</b>        | 3.77(1.98-7.20)                                                                          | 2.20(1.26-3.83) | 2.11(1.28-3.47) | 1.80(1.14-2.85) | 1.00                  | ↓         | 0.0001  |
| <b>Men (N=669)</b>                   |                                                                                          |                 |                 |                 |                       |           |         |
| <b>Age-adjusted</b>                  | 2.72(0.98-7.55)                                                                          | 1.84(0.82-4.13) | 1.86(0.88-3.94) | 1.73(0.88-3.39) | 1.00                  | ↓         | 0.07    |
| <b>Multivariable-adjusted</b>        | 3.32(0.99-11.1)                                                                          | 2.26(0.91-5.61) | 2.15(0.94-4.93) | 1.80(0.86-3.78) | 1.00                  | ↓         | 0.04    |
| <b>Women (N=548)</b>                 |                                                                                          |                 |                 |                 |                       |           |         |
| <b>Age-adjusted</b>                  | 3.48(1.72-7.05)                                                                          | 2.23(1.22-4.09) | 1.98(1.14-3.44) | 1.48(0.87-2.52) | 1.00                  | ↓         | 0.0002  |
| <b>Multivariable-adjusted</b>        | 3.95(1.82-8.56)                                                                          | 2.05(1.01-4.16) | 2.01(1.07-3.8)  | 1.82(1.01-3.28) | 1.00                  | ↓         | 0.0016  |

Strokes developed before atrial fibrillation were excluded from this analysis. Multivariable models adjusted for age, (sex for total), current smoking, systolic blood pressure, hypertension treatment, electrocardiographic left ventricular hypertrophy, diabetes, heart failure, significant heart murmur, and myocardial infarction. For trend test, time periods were coded 1(1958-1977), 2(1968-1977), 3(1978-1987), 4(1988-1997) and 5(1998-2007).
